# Supplementary material for: Pramipexole Augmentation for Treatment-Resistant Unipolar and Bipolar Depression in the Real World: A Systematic Review and Meta-Analysis
Source: MDPI journal article supplement (doi:10.3390/life13041043), 2023-04-19
Supplement: s1 [file s1]

**Supplementary Table S1.** Stratified and total pooled random-effect estimates of the proportion of drop-outs due to any adverse event and stratification by diagnosis. % W is the percentage weight of each study

| <i>Drop-outs due to<br/>any adverse event</i> | Events<br>(n) | Patients<br>(n) | Proportion   | 95%-CI      |              | %W<br>(random) |
|-----------------------------------------------|---------------|-----------------|--------------|-------------|--------------|----------------|
| <b>Unipolar</b>                               |               |                 |              |             |              |                |
| Fawcett et al. 2016 [85]                      | 5             | 24              | 20.8%        | 7.1%        | 42.2%        | 6.3            |
| Hori et al., 2012 [49]                        | 0             | 12              | 0.0%         | 0.0%        | 26.5%        | 15.2           |
| Inoue et al., 2010 [81]                       | 2             | 10              | 20.0%        | 2.5%        | 55.6%        | 2.7            |
| Sporn et al., 2000 [84]                       | 1             | 20              | 5.0%         | 0.1%        | 24.9%        | 18.2           |
| Tundo et al., 2022 [86]                       | 5             | 79              | 6.3%         | 2.1%        | 14.2%        | 57.6           |
| <b>Random-effect</b>                          |               |                 | <b>6.4%</b>  | <b>2.3%</b> | <b>10.5%</b> |                |
| <i>I<sup>2</sup>, %</i>                       |               |                 | <i>30.0</i>  |             |              |                |
| <b>Bipolar</b>                                |               |                 |              |             |              |                |
| Fawcett et al. 2016 [85]                      | 3             | 18              | 16.7%        | 3.6%        | 41.4%        | 16.9           |
| Hori et al., 2012 [49]                        | 0             | 5               | 0.0%         | 0.0%        | 52.2%        | 10.2           |
| Sporn et al., 2000 [84]                       | 3             | 12              | 25.0%        | 5.5%        | 57.2%        | 8.3            |
| Tundo et al., 2022 [86]                       | 3             | 37              | 8.1%         | 1.7%        | 21.9%        | 64.6           |
| <b>Random-effect</b>                          |               |                 | <b>10.1%</b> | <b>3.1%</b> | <b>17.2%</b> |                |
| <i>I<sup>2</sup>, %</i>                       |               |                 | <i>0.0</i>   |             |              |                |
| <b>Total</b>                                  |               |                 |              |             |              |                |
| Cassano et al., 2004 [80]                     | 5             | 23              | 21.7%        | 7.5%        | 43.7%        | 9.4            |
| Fawcett et al. 2016 [85]                      | 8             | 42              | 19.1%        | 8.6%        | 34.1%        | 14.1           |
| Hori et al., 2012 [49]                        | 0             | 17              | 0.0%         | 0.0%        | 19.5%        | 19.7           |
| Inoue et al., 2010 [81]                       | 2             | 10              | 20.0%        | 2.5%        | 55.6%        | 5.4            |
| Lattanzi et al., 2002 [82]                    | 5             | 31              | 16.1%        | 5.5%        | 33.7%        | 12.9           |
| Sporn et al., 2000 [84]                       | 4             | 32              | 12.5%        | 3.5%        | 29.0%        | 14.6           |
| Tundo et al., 2022 [86]                       | 8             | 116             | 6.9%         | 3.0%        | 13.1%        | 23.9           |
| <b>Overall random-effects</b>                 |               |                 | <b>11.4%</b> | <b>5.0%</b> | <b>17.8%</b> |                |
| <i>I<sup>2</sup>, %</i>                       |               |                 | <i>54.9</i>  |             |              |                |

**Supplementary Table S2.** Stratified and total pooled random-effect estimates of the proportion of drop-outs due to any reasons and stratification by diagnosis.

| <i>Drop-outs due to any reasons</i> | Events (n) | Patients (n) | Proportion   | 95%-CI       |              | %W (random) |
|-------------------------------------|------------|--------------|--------------|--------------|--------------|-------------|
| <b>Unipolar</b>                     |            |              |              |              |              |             |
| Hori et al., 2012 [49]              | 2          | 12           | 16.7%        | 2.1%         | 48.4%        | 22.8        |
| Inoue et al., 2010 [81]             | 2          | 10           | 20.0%        | 2.5%         | 55.6%        | 19.9        |
| Sporn et al., 2000 [84]             | 9          | 20           | 45.0%        | 23.1%        | 68.5%        | 22.2        |
| Tundo et al., 2022 [86]             | 6          | 79           | 7.6%         | 2.8%         | 15.8%        | 35.2        |
| <b>Random-effect</b>                |            |              | <b>20.4%</b> | <b>4.1%</b>  | <b>36.7%</b> |             |
| <i>I<sup>2</sup>, %</i>             |            |              | <i>73.8</i>  |              |              |             |
| <b>Bipolar</b>                      |            |              |              |              |              |             |
| Hori et al., 2012 [49]              | 0          | 5            | 0.0%         | 0.0%         | 52.2%        | 17.1        |
| Sporn et al., 2000 [84]             | 3          | 12           | 25.0%        | 5.5%         | 57.2%        | 13.9        |
| Tundo et al., 2022 [86]             | 5          | 37           | 13.5%        | 4.5%         | 28.8%        | 69.0        |
| <b>Random-effect</b>                |            |              | <b>12.8%</b> | <b>3.7%</b>  | <b>22.0%</b> |             |
| <i>I<sup>2</sup>, %</i>             |            |              | <i>11.3</i>  |              |              |             |
| <b>Total</b>                        |            |              |              |              |              |             |
| Cassano et al., 2004 [80]           | 14         | 23           | 60.9%        | 38.5%        | 80.3%        | 13.0        |
| Fawcett et al. 2016 [85]            | 15         | 42           | 35.7%        | 21.6%        | 52.0%        | 15.0        |
| Hori et al., 2012 [49]              | 2          | 17           | 11.8%        | 1.5%         | 36.4%        | 14.7        |
| Inoue et al., 2010 [81]             | 2          | 10           | 20.0%        | 2.5%         | 55.6%        | 11.3        |
| Lattanzi et al., 2002 [82]          | 12         | 31           | 38.7%        | 21.9%        | 57.8%        | 14.1        |
| Sporn et al., 2000 [84]             | 12         | 32           | 37.5%        | 21.1%        | 56.3%        | 14.2        |
| Tundo et al., 2022 [86]             | 11         | 116          | 9.5%         | 4.8%         | 16.3%        | 17.6        |
| <b>Overall random-effects</b>       |            |              | <b>29.7%</b> | <b>16.2%</b> | <b>43.3%</b> |             |
| <i>I<sup>2</sup>, %</i>             |            |              | <i>86.6</i>  |              |              |             |

**Supplementary Table S3.** Stratified and total pooled random-effect estimates of the proportion of (hypo)mania switch and stratification by diagnosis.

| <i>(Hypo)mania switch</i>     | Events (n) | Patients (n) | Proportion  | 95%-CI      |             | %W (random) |
|-------------------------------|------------|--------------|-------------|-------------|-------------|-------------|
| <b>Unipolar</b>               |            |              |             |             |             |             |
| Cassano et al., 2004 [80]     | 1          | 11           | 9.1%        | 0.2%        | 41.3%       | 0.8         |
| Fawcett et al. 2016 [85]      | 0          | 24           | 0.0%        | 0.0%        | 14.3%       | 7.8         |
| Hori et al., 2012 [49]        | 0          | 12           | 0.0%        | 0.0%        | 26.5%       | 2.2         |
| Inoue et al., 2010 [81]       | 0          | 10           | 0.0%        | 0.0%        | 30.9%       | 1.6         |
| Lattanzi et al., 2002 [82]    | 0          | 14           | 0.0%        | 0.0%        | 23.2%       | 2.9         |
| Sporn et al., 2000 [84]       | 0          | 20           | 0.0%        | 0.0%        | 16.8%       | 5.6         |
| Tundo et al., 2022 [86]       | 0          | 79           | 0.0%        | 0.0%        | 4.6%        | 79.2        |
| <b>Random-effect</b>          |            |              | <b>0.1%</b> | <b>0.0%</b> | <b>1.6%</b> |             |
| <i>I<sup>2</sup>, %</i>       |            |              | <i>0.0</i>  |             |             |             |
| <b>Bipolar</b>                |            |              |             |             |             |             |
| Cassano et al., 2004 [80]     | 2          | 12           | 16.7%       | 2.1%        | 48.4%       | 3.1         |
| Fawcett et al. 2016 [85]      | 0          | 18           | 0.0%        | 0.0%        | 18.5%       | 27.0        |
| Hori et al., 2012 [49]        | 0          | 5            | 0.0%        | 0.0%        | 52.2%       | 2.9         |
| Lattanzi et al., 2002 [82]    | 2          | 17           | 11.8%       | 1.5%        | 36.4%       | 6.0         |
| Perugi et al., 2001 [83]      | 1          | 10           | 10.0%       | 0.3%        | 44.5%       | 4.0         |
| Sporn et al., 2000 [84]       | 1          | 12           | 8.3%        | 0.2%        | 38.5%       | 5.7         |
| Tundo et al., 2022 [86]       | 1          | 37           | 2.7%        | 0.1%        | 14.2%       | 51.2        |
| <b>Random-effect</b>          |            |              | <b>3.5%</b> | <b>0.0%</b> | <b>7.2%</b> |             |
| <i>I<sup>2</sup>, %</i>       |            |              | <i>0.0</i>  |             |             |             |
| <b>Total</b>                  |            |              |             |             |             |             |
| Cassano et al., 2004 [80]     | 3          | 23           | 13.0%       | 2.8%        | 33.6%       | 1.0         |
| Fawcett et al. 2016 [85]      | 0          | 42           | 0.0%        | 0.0%        | 8.4%        | 18.6        |
| Hori et al., 2012 [49]        | 0          | 17           | 0.0%        | 0.0%        | 19.5%       | 3.3         |
| Inoue et al., 2010 [81]       | 0          | 10           | 0.0%        | 0.0%        | 30.9%       | 1.3         |
| Lattanzi et al., 2002 [82]    | 2          | 31           | 6.5%        | 0.8%        | 21.4%       | 2.6         |
| Perugi et al., 2001 [83]      | 1          | 10           | 10.0%       | 0.3%        | 44.5%       | 0.6         |
| Sporn et al., 2000 [84]       | 1          | 32           | 3.1%        | 0.1%        | 16.2%       | 5.3         |
| Tundo et al., 2022 [86]       | 1          | 116          | 0.9%        | 0.0%        | 4.7%        | 67.5        |
| <b>Overall random-effects</b> |            |              | <b>1.1%</b> | <b>0.0%</b> | <b>2.5%</b> |             |
| <i>I<sup>2</sup>, %</i>       |            |              | <i>0.0</i>  |             |             |             |
